# Supplementary material for: The Application of Sulfur Influences Microbiome of Soybean Rhizosphere and Nutrient-Mobilizing Bacteria in Andosol
Source: MDPI journal article supplement (doi:10.3390/microorganisms11051193), 2023-05-03
Supplement: s1 [file s1]

Table S1. Physicochemical properties of forest soil used in the study.

| <b>pH</b> | <b>Total C</b><br>(g C kg <sup>-1</sup> ) | <b>Total N</b><br>(g N kg <sup>-1</sup> ) | <b>Available S*</b><br>(mg S kg <sup>-1</sup> ) | <b>Soluble P* (mg</b><br><b>P<sub>2</sub>O<sub>5</sub> 100 g<sup>-1</sup>)</b> | <b>P adsorption</b><br><b>capacity* (mg</b><br><b>P<sub>2</sub>O<sub>5</sub> 100 g<sup>-1</sup>)</b> | <b>Fe<sub>o</sub></b><br>(g kg <sup>-1</sup> ) | <b>Fe<sub>d</sub></b><br>(g kg <sup>-1</sup> ) | <b>Al<sub>o</sub></b><br>(g kg <sup>-1</sup> ) | <b>Al<sub>d</sub></b><br>(g kg <sup>-1</sup> ) |
|-----------|-------------------------------------------|-------------------------------------------|-------------------------------------------------|--------------------------------------------------------------------------------|------------------------------------------------------------------------------------------------------|------------------------------------------------|------------------------------------------------|------------------------------------------------|------------------------------------------------|
| 5.2 ± 0.1 | 76.9 ± 1.9                                | 4.9 ± 0.1                                 | 21.3 ± 2.6                                      | 2.3 ± 0.6                                                                      | 2756.6 ± 17.7                                                                                        | 29.2 ±<br>0.4                                  | 43.6 ± 1.0                                     | 71.1 ±<br>0.3                                  | 17.4 ± 0.8                                     |

\*Lifted from Sugiura et al., 2022

Fe<sub>o</sub> and Al<sub>o</sub> were Fe and Al extractable from acid oxalate method, respectively.

Fe<sub>d</sub> and Al<sub>d</sub> were Fe and Al extractable from dithionite-citrate reduction method, respectively.

Table S2. Chemical reagents as nutrients amended in the soil for soybean pot experiment.

| Nutrient | Sulfur treatment (S)                                |         | Non-sulfur treatment (NS)                           |         |
|----------|-----------------------------------------------------|---------|-----------------------------------------------------|---------|
|          | Chemical Reagent                                    | (mg/kg) | Chemical Reagent                                    | (mg/kg) |
| K        | K <sub>2</sub> SO <sub>4</sub>                      | 170.0   | KCl                                                 | 145.5   |
| Mg       | MgSO <sub>4</sub> ·7H <sub>2</sub> O                | 389.1   | MgCl <sub>2</sub> ·6H <sub>2</sub> O                | 320.9   |
| N        | Urea (CH <sub>4</sub> N <sub>2</sub> O)             | 214.4   | Urea (CH <sub>4</sub> N <sub>2</sub> O)             | 214.4   |
| Cu       | CuCl <sub>2</sub> ·2H <sub>2</sub> O                | 1.4     | CuCl <sub>2</sub> ·2H <sub>2</sub> O                | 1.4     |
| Mn       | MnCl <sub>2</sub> ·4H <sub>2</sub> O                | 0.5     | MnCl <sub>2</sub> ·4H <sub>2</sub> O                | 0.5     |
| Co       | CoCl <sub>2</sub> ·6H <sub>2</sub> O                | 0.4     | CoCl <sub>2</sub> ·6H <sub>2</sub> O                | 0.4     |
| B        | H <sub>3</sub> BO <sub>3</sub>                      | 0.5     | H <sub>3</sub> BO <sub>3</sub>                      | 0.5     |
| Mo       | Na <sub>2</sub> MnO <sub>4</sub> ·2H <sub>2</sub> O | 0.5     | Na <sub>2</sub> MnO <sub>4</sub> ·2H <sub>2</sub> O | 0.5     |
| Zn       | ZnCl <sub>2</sub>                                   | 1.1     | ZnCl <sub>2</sub>                                   | 1.1     |

Table S3. PERMANOVA on the significance of the influence of soybean cultivation and sulfur fertilization on soil microbial community structure.

|                                     | Soybean Cultivation |                |        | Sulfur Application |                |        |
|-------------------------------------|---------------------|----------------|--------|--------------------|----------------|--------|
|                                     | F                   | R <sup>2</sup> | p      | F                  | R <sup>2</sup> | p      |
| Microbial<br>Community<br>Structure | 6.8081              | 0.4050         | <0.002 | 1.0448             | 0.0946         | <0.318 |

F values indicate the magnitude of change on the microbial community structure. Significance level at  $p<0.05$ .

Table S4. Spearman's rank correlation coefficients of the abundance of microbial community and organic acids from soybean under sulfur applications.

| <b>Genus</b>            | <b>Malonic</b>    | <b>Malic</b>       | <b>Tartaric</b>   | <b>Citric</b>      |
|-------------------------|-------------------|--------------------|-------------------|--------------------|
| <i>Aquicella</i>        | 0.41              | 0.57 <sup>+</sup>  | 0.46              | 0.46               |
| <i>Arthrobacter</i>     | -0.41             | -0.53 <sup>+</sup> | -0.32             | -0.44              |
| <i>Bacillus</i>         | -0.75**           | -0.86**            | -0.80**           | -0.77**            |
| <i>Burkholderia</i>     | 0.82**            | 0.92**             | 0.91**            | 0.84**             |
| <i>Catenulispora</i>    | 0.48              | 0.64*              | 0.80**            | 0.49               |
| <i>Chthoniobacter</i>   | -0.62*            | -0.70*             | -0.64*            | -0.57 <sup>+</sup> |
| <i>Dyella</i>           | 0.72**            | 0.54 <sup>+</sup>  | 0.68*             | 0.78**             |
| <i>Edaphobacter</i>     | -0.65*            | -0.68*             | -0.68*            | -0.69*             |
| <i>Flavisolibacter</i>  | -0.82**           | -0.89**            | -0.85**           | -0.82**            |
| <i>Ideonella</i>        | -0.76**           | -0.82**            | -0.75**           | -0.78**            |
| <i>Labilithrix</i>      | 0.43              | 0.63*              | 0.54 <sup>+</sup> | 0.45               |
| <i>Mesorhizobium</i>    | 0.82**            | 0.84**             | 0.95**            | 0.83**             |
| <i>Mycobacterium</i>    | -0.30             | -0.54 <sup>+</sup> | -0.34             | -0.27              |
| <i>Nitrospira</i>       | 0.59*             | 0.63*              | 0.60*             | 0.60*              |
| <i>Paraburkholderia</i> | 0.80**            | 0.90**             | 0.89**            | 0.78**             |
| <i>Polaromonas</i>      | 0.39              | 0.52 <sup>+</sup>  | 0.46              | 0.33               |
| <i>Rhizobium</i>        | 0.53 <sup>+</sup> | 0.53 <sup>+</sup>  | 0.73**            | 0.54 <sup>+</sup>  |
| <i>Sphingomonas</i>     | -0.89**           | -0.86**            | -0.84**           | -0.88**            |
| <i>Streptomyces</i>     | 0.79**            | 0.72**             | 0.85**            | 0.81**             |
| <i>Undibacterium</i>    | 0.58*             | 0.78**             | 0.66*             | 0.55 <sup>+</sup>  |

Significant relationships at \*\*  $p < 0.01$ ; \*  $p < 0.05$ ; +  $p < 0.10$ .

Table S5. Characteristics and identity of cultivable bacteria from rhizospheres of NS and S applied soybean.

| Isolate            | Source | Type of Isolation* | % Identity | 16S rRNA                    | Gram Reaction <sup>a</sup> | Cellular morphology <sup>b</sup> | Colony morphology <sup>c</sup>                 |
|--------------------|--------|--------------------|------------|-----------------------------|----------------------------|----------------------------------|------------------------------------------------|
| JSC1               | S      | Ca-PSB             | 93.8       | <i>Paraburkholderia</i> sp. | -                          | coccobacilli                     | entire, translucent, convex, moist, punctiform |
| JSC2               | S      | Ca-PSB             | 97.1       | <i>Burkholderia</i> sp.     | -                          | coccobacilli                     | entire, cream, convex, moist, punctiform       |
| JSC4               | S      | Ca-PSB             | 93.1       | <i>Burkholderia</i> sp.     | -                          | coccobacilli                     | entire, cream, convex, moist, punctiform       |
| JSC5 <sup>+</sup>  | S      | Ca-PSB             | 94.9       | <i>Burkholderia</i> sp.     | -                          | coccobacilli                     | entire, cream, convex, moist, punctiform       |
| JSC6               | S      | Ca-PSB             | 97.3       | <i>Paraburkholderia</i> sp. | -                          | coccobacilli                     | entire, cream, convex, shiny, punctiform       |
| JSC7               | S      | Ca-PSB             | 94.3       | <i>Paraburkholderia</i> sp. | -                          | coccobacilli                     | entire, cream, convex, moist, punctiform       |
| JSC9               | S      | Ca-PSB             | 98.9       | <i>Paraburkholderia</i> sp. | -                          | coccobacilli                     | entire, cream, convex, moist, punctiform       |
| JSC10 <sup>+</sup> | S      | Ca-PSB             | 99.7       | <i>Burkholderia</i> sp.     | -                          | coccobacilli                     | entire, cream, convex, moist, punctiform       |
| JSC11              | S      | Ca-PSB             | 99.1       | <i>Burkholderia</i> sp.     | -                          | coccobacilli                     | entire, cream, convex, moist, punctiform       |
| JSC12              | S      | Ca-PSB             | 99.6       | <i>Paraburkholderia</i> sp. | -                          | coccobacilli                     | entire, cream, convex, moist, punctiform       |
| JSC13 <sup>+</sup> | NS     | Ca-PSB             | 99.8       | <i>Burkholderia</i> sp.     | -                          | coccobacilli                     | entire, cream, convex, moist, punctiform       |
| JSC14              | NS     | Ca-PSB             | 87.2       | <i>Paraburkholderia</i> sp. | -                          | coccobacilli                     | entire, translucent, convex, shiny, punctiform |
| JSC15              | NS     | Ca-PSB             | 95.9       | <i>Burkholderia</i> sp.     | -                          | coccobacilli                     | entire, cream, convex, moist, punctiform       |
| JSC16              | NS     | Ca-PSB             | 99.8       | <i>Burkholderia</i> sp.     | -                          | coccobacilli                     | entire, cream, convex, moist, punctiform       |
| JSC17              | NS     | Ca-PSB             | 99.2       | <i>Burkholderia</i> sp.     | -                          | coccobacilli                     | entire, cream, convex, moist, punctiform       |
| JSC18              | NS     | Ca-PSB             | 87.6       | <i>Paraburkholderia</i> sp. | -                          | coccobacilli                     | entire, cream, convex, moist, punctiform       |

|                    |    |        |      |                             |   |              |                                                |
|--------------------|----|--------|------|-----------------------------|---|--------------|------------------------------------------------|
| JSC19              | NS | Ca-PSB | 97.0 | <i>Paraburkholderia</i> sp. | - | coccobacilli | entire, cream, convex, moist, punctiform       |
| JSC20              | NS | Ca-PSB | 97.9 | <i>Paraburkholderia</i> sp. | - | coccobacilli | entire, iridescent, convex, moist, punctiform  |
| JSC21              | NS | Ca-PSB | 95.9 | <i>Burkholderia</i> sp.     | - | coccobacilli | entire, cream, convex, moist, punctiform       |
| JSC22 <sup>+</sup> | NS | Ca-PSB | 99.9 | <i>Burkholderia</i> sp.     | - | coccobacilli | entire, cream, convex, moist, punctiform       |
| JSA1 <sup>+</sup>  | S  | Al-PSB | 98.9 | <i>Burkholderia</i> sp.     | - | coccobacilli | entire, cream, convex, moist, punctiform       |
| JSA2               | S  | Al-PSB | 99.1 | <i>Paraburkholderia</i> sp. | - | coccobacilli | entire, cream, convex, moist, punctiform       |
| JSA3               | S  | Al-PSB | 99.8 | <i>Burkholderia</i> sp.     | - | coccobacilli | entire, cream, convex, moist, punctiform       |
| JSA5 <sup>+</sup>  | S  | Al-PSB | 99.9 | <i>Burkholderia</i> sp.     | - | coccobacilli | entire, cream, convex, moist, punctiform       |
| JSA6               | S  | Al-PSB | 98.9 | <i>Paraburkholderia</i> sp. | - | coccobacilli | entire, cream, convex, moist, punctiform       |
| JSA8               | NS | Al-PSB | 99.8 | <i>Burkholderia</i> sp.     | - | coccobacilli | entire, opaque, convex, moist, punctiform      |
| JSA9               | NS | Al-PSB | 99.8 | <i>Burkholderia</i> sp.     | - | coccobacilli | entire, cream, convex, moist, punctiform       |
| JSA10 <sup>+</sup> | NS | Al-PSB | 98.6 | <i>Paraburkholderia</i> sp. | - | coccobacilli | entire, iridescent, convex, shiny, punctiform  |
| JSA12 <sup>+</sup> | NS | Al-PSB | 99.9 | <i>Burkholderia</i> sp.     | - | coccobacilli | entire, cream, convex, moist, punctiform       |
| JSA13              | NS | Al-PSB | 99.1 | <i>Paraburkholderia</i> sp. | - | coccobacilli | entire, translucent, convex, shiny, punctiform |
| JSF7               | S  | SPB    | 99.9 | <i>Pseudomonas</i> sp.      | - | coccobacilli | entire, translucent, convex, moist, round      |
| JSF8 <sup>+</sup>  | S  | SPB    | 92.9 | <i>Pseudomonas</i> sp.      | - | coccobacilli | entire, iridescent, convex, moist, round       |
| JSF9               | S  | SPB    | 98.3 | <i>Burkholderia</i> sp.     | - | coccobacilli | entire, translucent, convex, moist, punctiform |
| JSF10 <sup>+</sup> | S  | SPB    | 99.9 | <i>Burkholderia</i> sp.     | - | coccobacilli | entire, translucent, convex, shiny, punctiform |
| JSF11              | NS | SPB    | 99.7 | <i>Pseudomonas</i> sp.      | - | coccobacilli | entire, translucent, convex, moist, round      |

|                    |    |     |       |                         |   |              |                                                |
|--------------------|----|-----|-------|-------------------------|---|--------------|------------------------------------------------|
| JSF12 <sup>+</sup> | NS | SPB | 98.4  | <i>Burkholderia</i> sp. | - | coccobacilli | entire, opaque, convex, moist, punctiform      |
| JSF14              | NS | SPB | 83.6  | <i>Pseudomonas</i> sp.  | - | coccobacilli | entire, brown, convex, shiny, punctiform       |
| JSF15 <sup>+</sup> | NS | SPB | 97.4  | <i>Burkholderia</i> sp. | - | coccobacilli | entire, opaque, convex, shiny, punctiform      |
| JSS1               | S  | APB | 95.0  | <i>Pseudomonas</i> sp.  | - | coccobacilli | entire, opaque, convex, moist, round           |
| JSS2               | S  | APB | 90.8  | <i>Burkholderia</i> sp. | - | coccobacilli | entire, opaque, convex, shiny, punctiform      |
| JSS3 <sup>+</sup>  | S  | APB | 96.0  | <i>Pseudomonas</i> sp.  | - | coccobacilli | entire, opaque, convex, moist, round           |
| JSS4 <sup>+</sup>  | S  | APB | 90.0  | <i>Pseudomonas</i> sp.  | - | coccobacilli | entire, opaque, convex, moist, round           |
| JSS5               | S  | APB | 99.0  | <i>Pseudomonas</i> sp.  | - | coccobacilli | entire, opaque, convex, moist, round           |
| JSS6               | S  | APB | 94.0  | <i>Pseudomonas</i> sp.  | - | coccobacilli | entire, opaque, convex, moist, round           |
| JSS7               | NS | APB | 100.0 | <i>Pseudomonas</i> sp.  | - | coccobacilli | entire, cream, convex, moist, punctiform       |
| JSS8               | NS | APB | 96.6  | <i>Burkholderia</i> sp. | - | coccobacilli | entire, translucent, convex, shiny, punctiform |
| JSS9               | NS | APB | 97.2  | <i>Burkholderia</i> sp. | - | coccobacilli | entire, translucent, convex, moist, punctiform |
| JSS10              | NS | APB | 91.0  | <i>Pseudomonas</i> sp.  | - | coccobacilli | entire, translucent, convex, moist, round      |
| JSS11 <sup>+</sup> | NS | APB | 93.0  | <i>Pseudomonas</i> sp.  | - | coccobacilli | wavy, translucent, flat, shiny, irregular      |
| JSS12              | NS | APB | 99.7  | <i>Burkholderia</i> sp. | - | coccobacilli | entire, cream, convex, moist, punctiform       |

\*Ca-PSB: phosphate solubilization from tricalcium phosphate; Al-PSB: phosphate solubilization from aluminum phosphate; SPB: siderophore production based from yellow to orange halo zones; APB: arylsulfatase-producing bacteria observed based on the formation of blue colony

<sup>a</sup>Gregersen's method

<sup>b</sup>Observed in oil immersion objective

<sup>c</sup>Grown on Luria-Bertani agar and observed after 24 hours

<sup>+</sup>Isolates selected for multiple nutrient mobilization traits

Table S6. Characterization of top fifteen isolates with multiple nutrients mobilizing traits.

| Isolate | Source | Bacterial Identity          | Ca-PS     | Al-PS     | Siderophore | Arylsulfatase |
|---------|--------|-----------------------------|-----------|-----------|-------------|---------------|
| JSC5    | S      | <i>Burkholderia</i> sp.     | 2.39±0.06 | 3.04±0.03 | 1.02±0.02   | +             |
| JSC10   | S      | <i>Burkholderia</i> sp.     | 2.55±0.07 | 3.79±0.09 | 1.00±0.00   | +             |
| JSC13   | NS     | <i>Burkholderia</i> sp.     | 2.90±0.08 | 3.71±0.09 | 1.49±0.02   | +             |
| JSC22   | NS     | <i>Burkholderia</i> sp.     | 2.38±0.04 | 3.31±0.08 | 1.00±0.00   | +             |
| JSA1    | S      | <i>Burkholderia</i> sp.     | 2.74±0.04 | 4.42±0.08 | 1.51±0.02   | ++            |
| JSA5    | S      | <i>Burkholderia</i> sp.     | 2.00±0.06 | 4.06±0.05 | 2.19±0.04   | +             |
| JSA10   | NS     | <i>Paraburkholderia</i> sp. | 1.88±0.16 | 2.94±0.10 | 1.58±0.15   | +             |
| JSA12   | NS     | <i>Burkholderia</i> sp.     | 2.50±0.03 | 4.27±0.09 | 2.63±0.06   | +             |
| JSF8    | S      | <i>Pseudomonas</i> sp.      | 1.11±0.05 | 1.00±0.00 | 1.95±0.02   | +             |
| JSF10   | S      | <i>Burkholderia</i> sp.     | 1.06±0.05 | 1.00±0.00 | 2.70±0.04   | +             |
| JSF12   | NS     | <i>Burkholderia</i> sp.     | 2.25±0.03 | 3.64±0.06 | 2.06±0.06   | +             |
| JSF15   | NS     | <i>Burkholderia</i> sp.     | 1.00±0.00 | 2.78±0.04 | 2.42±0.02   | +             |
| JSS3    | S      | <i>Pseudomonas</i> sp.      | 1.15±0.01 | 1.00±0.00 | 1.69±0.04   | ++            |
| JSS4    | S      | <i>Pseudomonas</i> sp.      | 1.06±0.05 | 1.00±0.00 | 1.59±0.02   | ++            |
| JSS11   | NS     | <i>Pseudomonas</i> sp.      | 1.72±0.24 | 1.32±0.01 | 2.13±0.09   | ++            |

Ca-PS: phosphate solubilization index from tricalcium phosphate; Al-PS: phosphate solubilization index from aluminum phosphate; Siderophore: siderophore production index based from yellow to orange halo zones; Arylsulfatase: observed based on the formation of blue colony
