# Supplementary material for: The Application of Sulfur Influences Microbiome of Soybean Rhizosphere and Nutrient-Mobilizing Bacteria in Andosol
Source: MDPI journal article supplement (doi:10.3390/microorganisms11051193), 2023-05-03
Supplement: s1 [file s1]

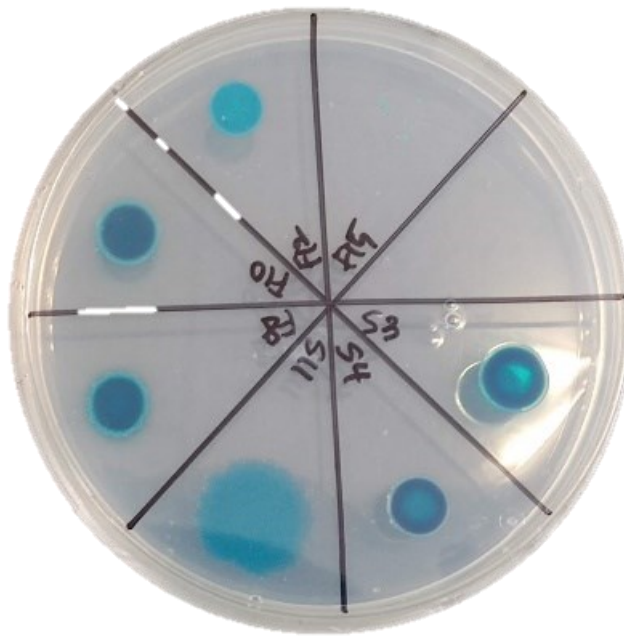

**Figure S1. Arylsulfatase-producing bacteria exhibiting varying intensities of blue color colonies grown in M9 minimal medium with chromogenic 5-bromo-4-chloro-3-indolyl sulfate.**

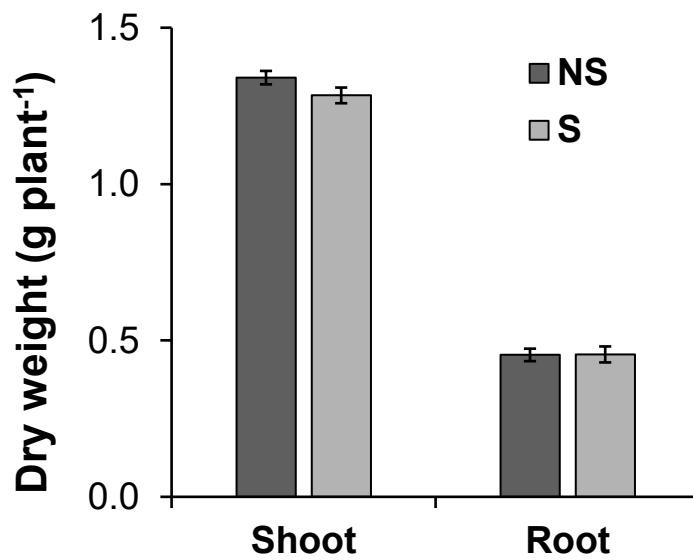

**Figure S2. Shoot and root dry weights of soybean cultivar Enrei after six weeks after sowing under non-sulfur (NS) and sulfur (S) application treatments.**

Significant difference between the treatments determined by *t*-test . The error bar indicates the standard error of five replications.

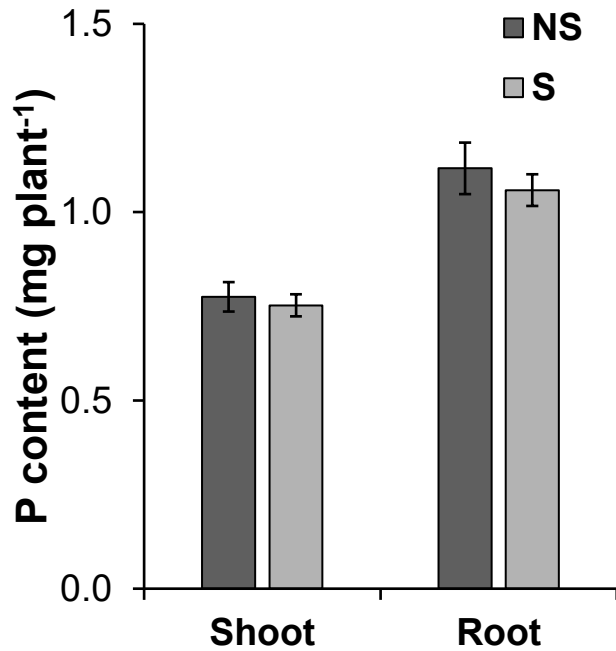

**Figure S3. P content of soybean cultivar Enrei after six weeks after sowing under non-sulfur (NS) and sulfur (S) application treatments.**

Significant difference between the treatments determined by *t*-test. The error bar indicates the standard error of four replications.

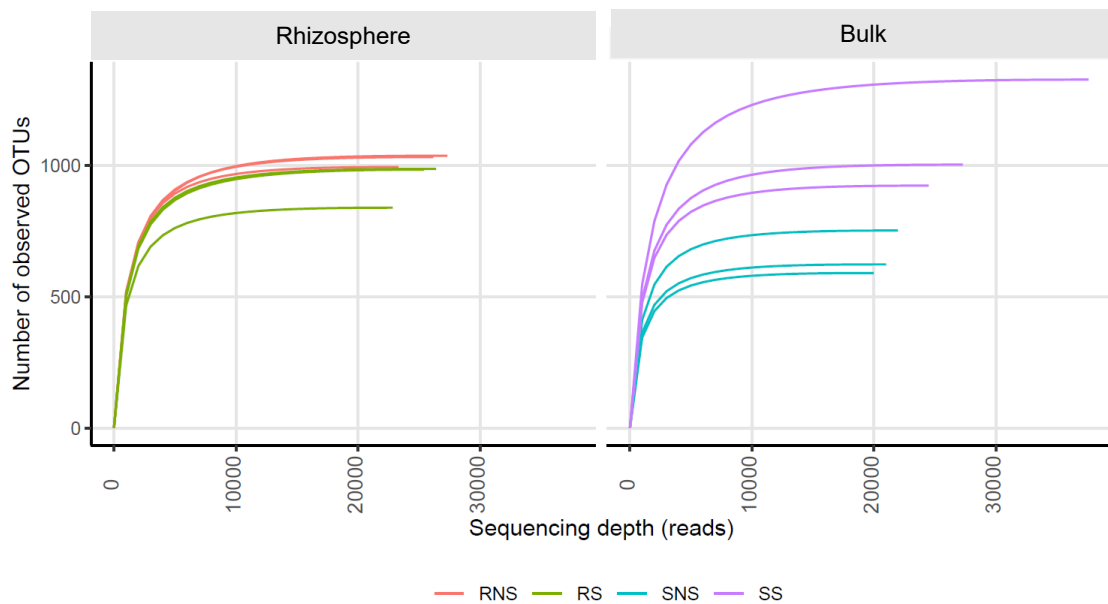

**Figure S4. Rarefaction curve for the soil samples uncultivated Bulk (S) or cultivated (R) with soybean ‘Enrei’ under non-sulfur (NS) or sulfur (S) applications based on observed OTUs.**

A

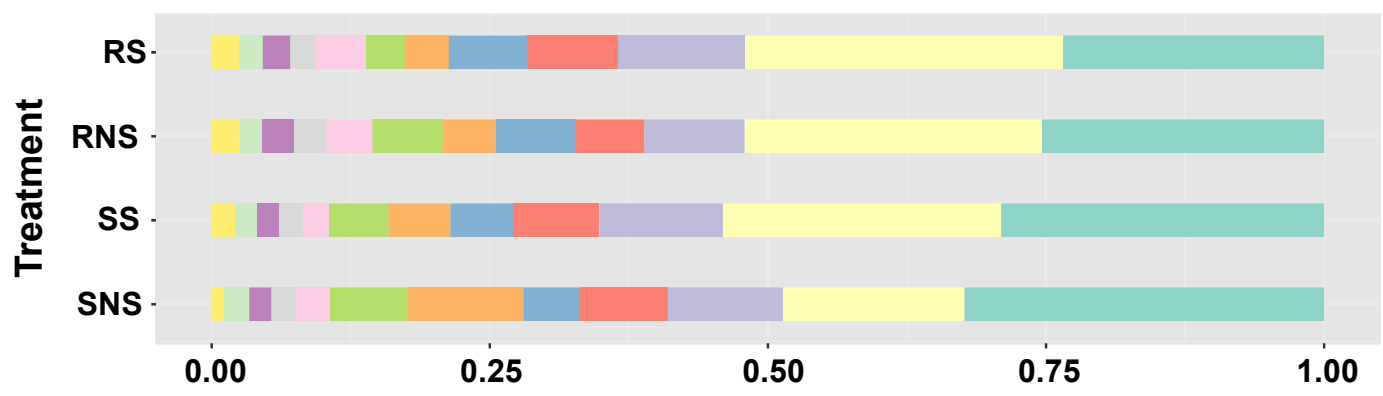

B

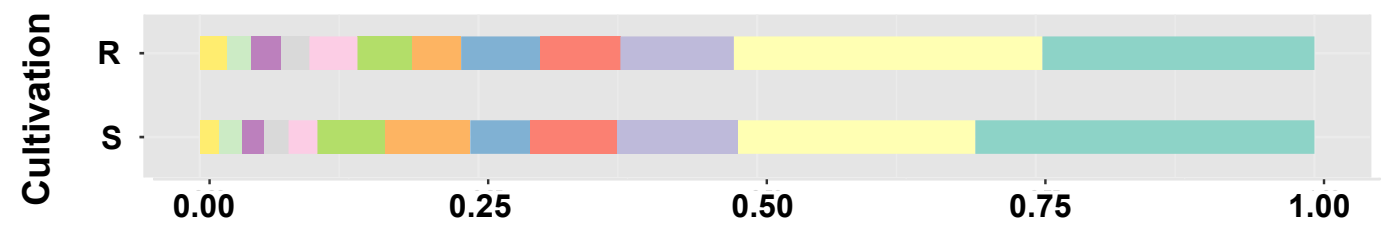

C

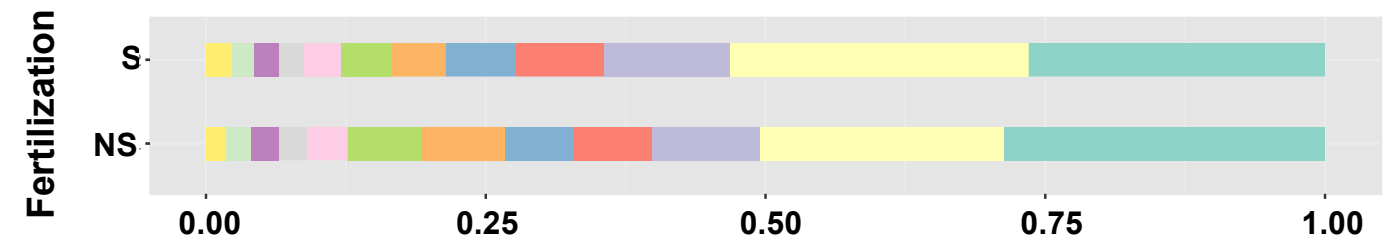

Relative Abundance

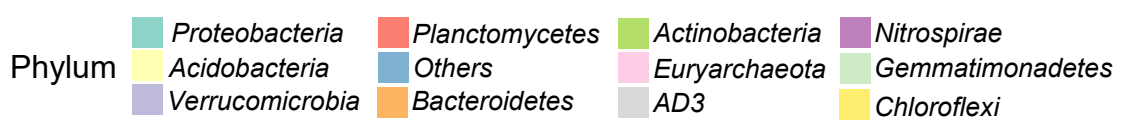

**Figure S5. Relative abundance of phyla across the samples (A), soybean cultivation (B), and S application (C).**  
RS: with soybean cultivation and sulfur application; RNS: with soybean cultivation and non-sulfur application; SS: without soybean cultivation and sulfur application; SNS: without soybean cultivation and non-sulfur application; Rhizosphere: with soybean cultivation; Bulk: without soybean cultivation; S: sulfur application; NS: non-sulfur application

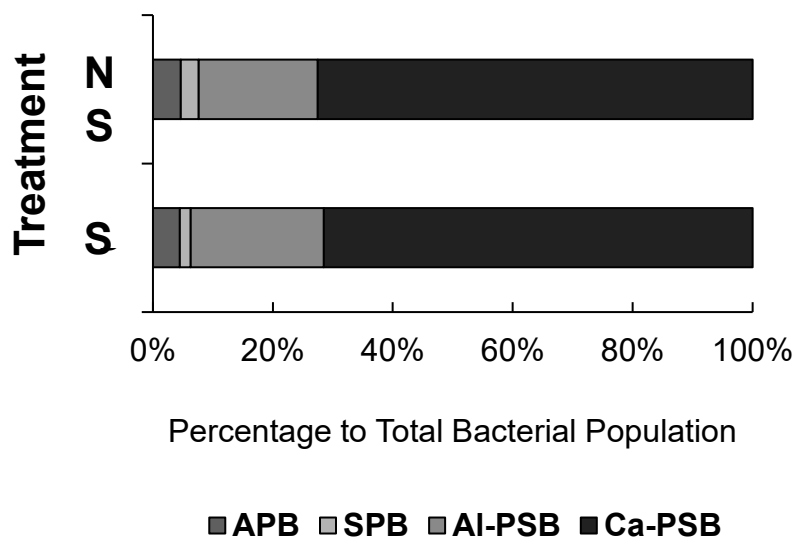

**Figure S6. Percentage to total bacterial population of PSB, SPB, and APB residing in the rhizosphere of non-sulfur (NS) and sulfur (S) applied soybean.**

APB: arylsulfatase producing bacteria; SPB: siderophore producing bacteria; AI-PSB: bacteria that can solubilize phosphorus from aluminum phosphate; Ca-PSB: bacteria that can solubilize phosphorus from tricalcium phosphate

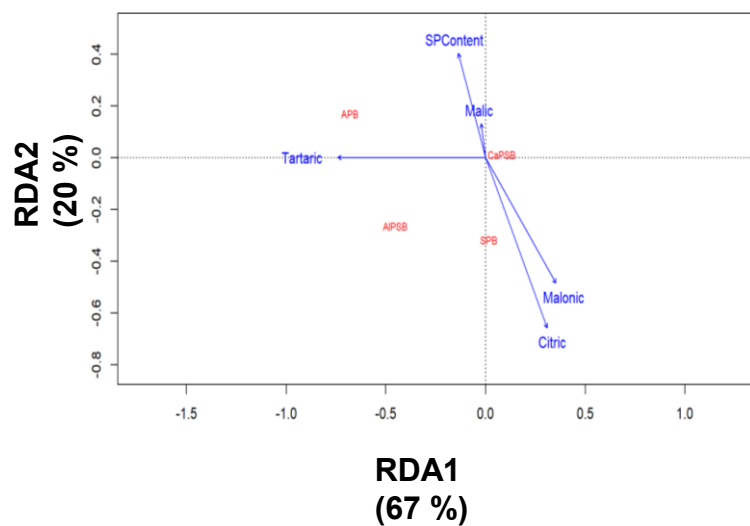

**Figure S7. Redundancy analysis plot of the relationships of the plant traits and population of nutrient mobilizing bacteria residing in the soybean rhizosphere with NS and S treatments.**

SPcontent: shoot P content; APB: arylsulfatase producing bacteria; AIPSB: aluminum phosphate solubilizing bacteria; CaPSB: tricalcium phosphate solubilizing bacteria; SPB: siderophore producing bacteria

**A**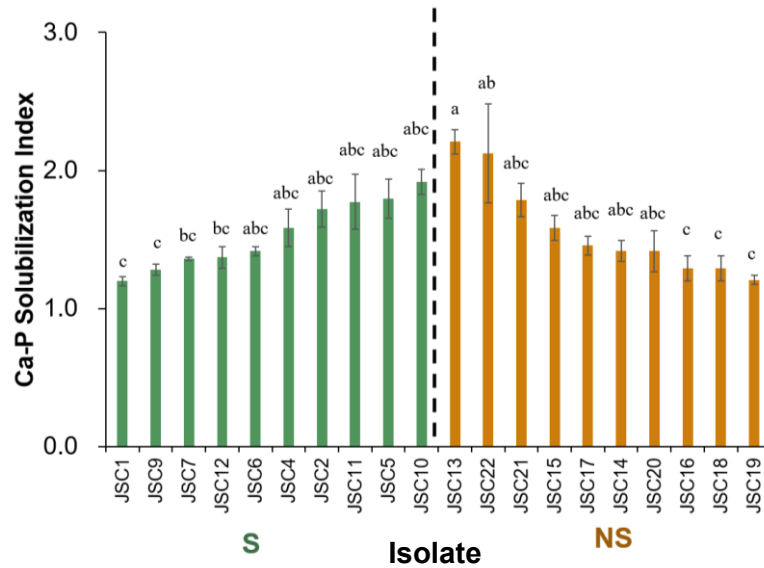**B**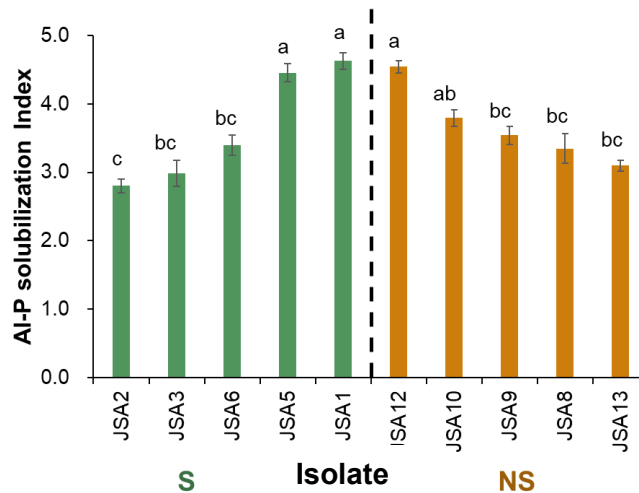**C**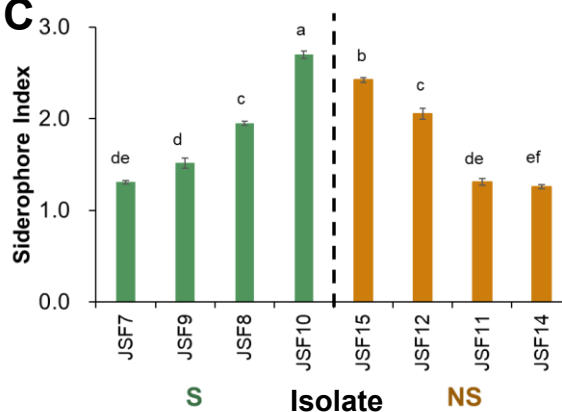

**Figure S8. Indices of isolates for tricalcium (Ca-P) phosphate solubilization (A), aluminum (Al-P) phosphate solubilization (B), and siderophore production (C).**

S: sulfur application; NS: non-sulfur application. Significant difference between the isolates determined by Tukey's test ( $p < 0.05$ ). The error bar indicates the standard error of three replications.
